# Supplementary material for: High sensitivity cysteine detection using novel fluorescent Ag nanoclusters
Source: Royal Society of Chemistry journal article supplement (doi:10.1039/c7ay00310b), 2017-01-01
Supplement: c7ay00310b1.pdf [file c7ay00310b1.pdf]

## Supporting information for

### High Sensitivity Cysteine Detection Using a Novel Fluorescent Ag Nanocluster

Hao Min Liu, Gang Mei, Shu Chen, Yun Fei Long\*

Key Laboratory of Theoretical Organic Chemistry and Function Molecule, Ministry of Education, School of Chemistry and Chemical Engineering, Hunan University of Science and Technology, Xiangtan, 411201, PR China.

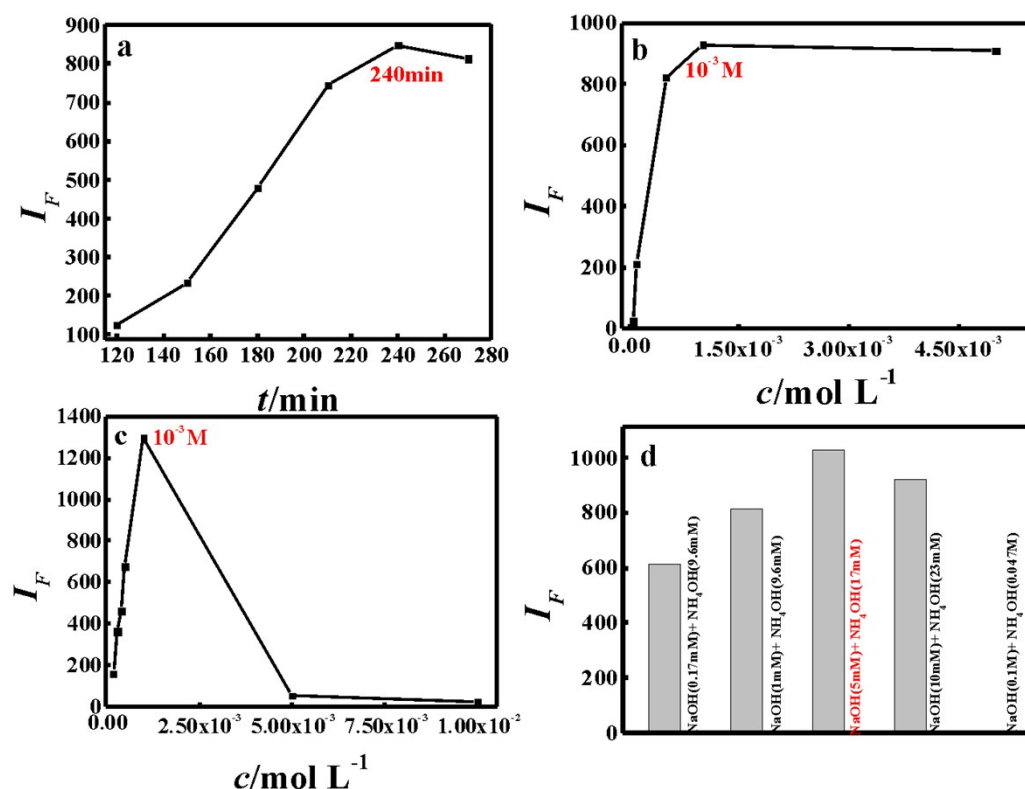

**Fig.S1.** The optimizing experiments of synthesis LSPR-AgNCs. (a) The fluorescence intensity of LSPR-AgNCs (diluted 50-fold) in different irradiation time (120 min, 150 min, 180 min, 210 min, 240 min and 70 min). (b) Different carboxymethyl dextran concentrations ( $5.0 \times 10^{-5}$ ,  $1.0 \times 10^{-4}$ ,  $5.0 \times 10^{-4}$ ,  $1.0 \times 10^{-3}$ ,  $5.0 \times 10^{-5} M$ ). (c) Different  $Ag^+$  concentrations ( $2.0 \times 10^{-4}$ ,  $3.0 \times 10^{-4}$ ,  $4.0 \times 10^{-4}$ ,  $5.0 \times 10^{-4}$ ,  $1.0 \times 10^{-3}$ ,  $5.0 \times 10^{-3}$ ,  $1.0 \times 10^{-2} M$ ). (d) The degree of acid/alkali of solution was adjusted by NaOH and  $NH_3 \cdot H_2O$ . We study different concentrations NaOH and  $NH_3 \cdot H_2O$  (shown in d, Fig. S1). The optimizing conditions of synthesis LSPR-AgNCs was presented, i.e., irradiation time (240 min), carboxymethyl dextran ( $1.0 \times 10^{-3} M$ ),  $Ag^+$  ( $1.0 \times 10^{-3} M$ ), and the ratio of NaOH to  $NH_3 \cdot H_2O$  (NaOH(5 mM)+  $NH_3 \cdot H_2O$ (17 mM)).

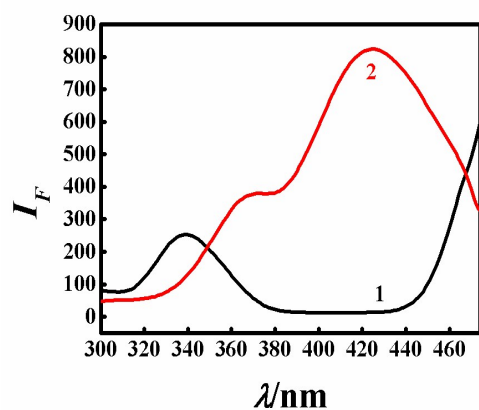

**Fig. S2.** The emission fluorescence spectra of as- prepared Ag nanoclusters (spectrum 1) and the diluted 50-fold Ag nanoclusters (spectrum 2).

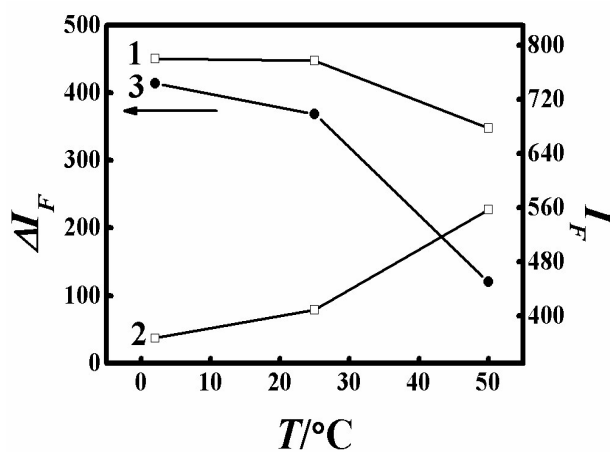

**Fig. S3.** The fluorescence intensity of LSPR-AgNCs (diluted 50-fold) in the absence (curve 1) and presence (curve 2) of Cys ( $1 \times 10^{-7} \text{ mol} \cdot \text{L}^{-1}$ ) with different temperature including 0 °C, 25 °C and 50 °C. The curve 3 represented the change of  $\Delta I$  with different temperature.

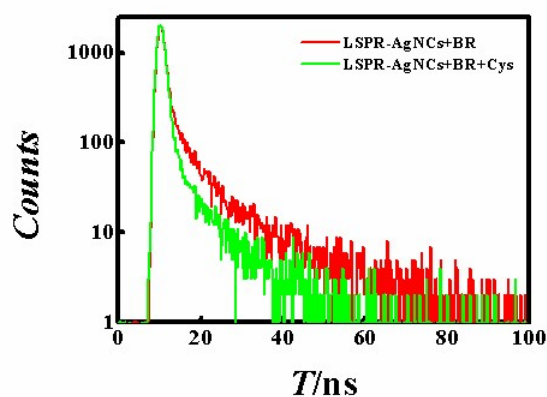

**Fig. S4.** Fluorescence decay as a function of time of LSPR-AgNCs, LSPR-AgNCs+BR and LSPR-AgNCs+BR+Cys. ( $\text{BR} = 6.80$ ,  $c_{\text{Cys}} = 1.0 \times 10^{-7} \text{ mol} \cdot \text{L}^{-1}$ ).

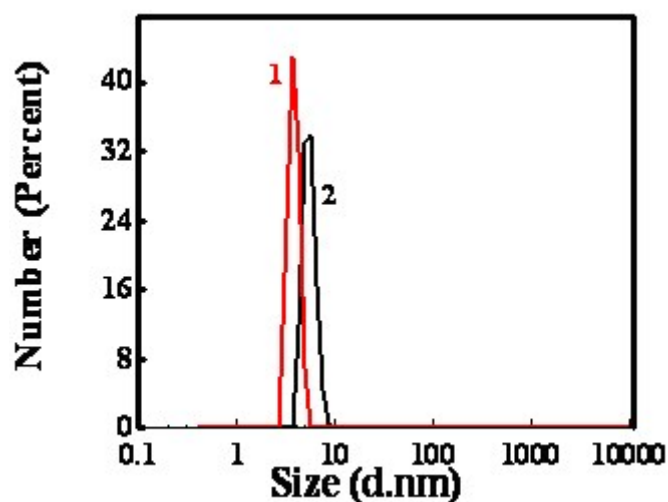

**Fig. S5.** The DLS spectra of the Ag NCs. Curve 1 is DLS spectra of the Ag NCs without Cys. Curve 2 is the DLS spectra of the Ag NCs after adding Cys.

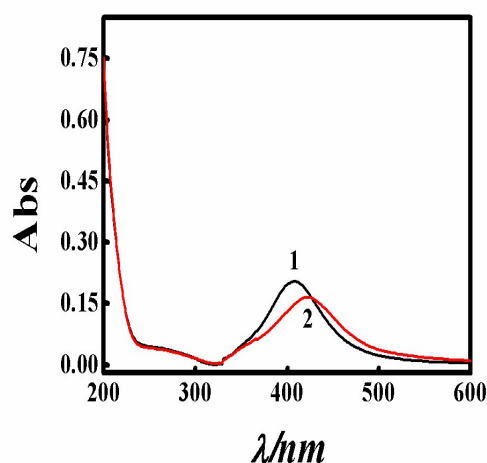

**Fig. S6.** The UV-Vis spectra of the Ag NCs. Curve 1 is the absorption spectrum of the Ag NCs without Cys. Curve 2 is the absorption spectrum of the Ag NCs mixture with Cys.

**Table S1.** The fluorescence lifetimes of LSPR-AgNCs+BR and LSPR-AgNCs+BR+Cys.

| Sample            | $\tau_1, B_1$  | $\tau_2, B_2$   | Lifetime (ns) |
|-------------------|----------------|-----------------|---------------|
| LSPR-AgNCs+BR     | 2.1896, 33.60% | 10.5884, 66.40% | 7.7664        |
| LSPR-AgNCs+BR+Cys | 1.1585, 21.81% | 6.2982, 78.19%  | 5.1772        |

$B_1, B_2$  are the relative amplitude of  $\tau_1, \tau_2$ .

**Table S2** Zeta Potential measurements data of LSPR-AgNCs, LSPR-AgNCs-BR and LSPR-

AgNCS-BR-Cys

| Sample            | T (°C) | Average ZP (mV) |
|-------------------|--------|-----------------|
| LSPR-AgNCs+BR     | 25     | -14 mV          |
| LSPR-AgNCs+BR+Cys | 25     | -14.2 mV        |

Table S3. Determination results of Cys in Compound amino acid injection.

| Sample number | Detection value (mol/L)                                                     | Average value (mol/L) | Specified (mol/L)     | RE (%) |
|---------------|-----------------------------------------------------------------------------|-----------------------|-----------------------|--------|
| 1             | 3.33×10 <sup>-3</sup> ;<br>2.86×10 <sup>-3</sup> ;<br>3.57×10 <sup>-3</sup> | 3.25×10 <sup>-3</sup> | 3.30×10 <sup>-3</sup> | 1.51   |

Table S4 Comparison with other sensors for Cys detection

| Method            | Probe                                                  | Linear range | Detection limit | Ref.      |
|-------------------|--------------------------------------------------------|--------------|-----------------|-----------|
| Photoluminescence | NC-dots/AuNPs                                          | 0.01-2.0 μM  | 4.00 nM         | [1]       |
| Absorbance        | NC-dots/AuNPs                                          | 0.02-2.0 μM  | 8.00 nM         | [1]       |
| Absorbance        | N-butyl-4-bromo-3-nitro-1,8-naphthalimide              | 0.1-0.9 mM   | -               | [2]       |
| Absorbance        | di-N-methyl-N-hydroxyethylaniline squaraine(SQ)        | 10-700 nM    | 3.90 nM         | [3]       |
| Fluorescence      | Acrylic acid 3-acetyl-2-oxo-2 H-chromen-7-ylester(ACA) | 0-40 μM      | 0.65μM          | [4]       |
| Fluorescence      | Thiol-disulfide                                        | 0-10 μM      | 0.80 μM         | [5]       |
| Fluorescence      | Ag clusters                                            | 0.025-6.0 μM | 20 nM           | [6]       |
| Fluorescence      | AgNCs                                                  | 0-1 μM       | 3 nM            | [7]       |
| Fluorescence      | LSPR-AgNCs                                             | 0.5-100 nM   | 0.32 nM         | This work |

## References

- [1] J. Deng, Q. Lu, Y. Hou, M. Liu, H. Li, Y. Zhang, S. Yao, Nanosensor composed of N-doped carbon dots and Au nanoparticles for high selective detection of cysteine with multiple signals, *Anal. Chem.* 87 (2015) 2195-2203.
- [2] X. Zeng, X. Zhang, B. Zhu, H. Jia, Y. Li, A highly selective wavelength-ratiometric and colorimetric probe for cysteine, *Dyes. Pigments.* 94 (2012) 10-15.
- [3] Z. Yan, S. Guang, H. Xu, X. Liu, An effective real-time colorimetric sensor for sensitive and selective detection of cysteine under physiological conditions, *Analyst* 136 (2011) 1916-1921.
- [4] X. Dai, Q.H. Wu, P.C. Wang, J. Tian, Y. Xu, S.Q. Wang, J.Y. Miao, B.X. Zhao, A simple and effective coumarin-based fluorescent probe for cysteine, *Biosens. Bioelectron.* 59 (2014) 35-39.
- [5] L.Q. Zheng, Y. Li, X.D. Yu, J.J. Xu, H.Y. Chen, A sensitive and selective detection method for thiol compounds using novel fluorescence probe, *Anal. Chim. Acta* 850 (2014) 71-77.
- [6] L. Shang, S. Dong, Sensitive detection of cysteine based on fluorescent silver clusters, *Biosens. Bioelectron.*, 24 (2009) 1569-1573.
- [7] X. Yuan, Y.Q. Tay, X.Y. Dou, Z.T. Luo, D.T. Leong, J.P. Xie, Glutathione-Protected Silver Nanoclusters as Cysteine-Selective Fluorometric and Colorimetric Probe, *Anal. Chem.* 85(2013) 1913-1919
